# Supplementary material for: Micro-flow synthesis and structural analysis of sterically crowded diimine ligands with five aryl rings
Source: PubMed Central journal article supplement (PMC3869212; doi:10.3762/bjoc.9.268), 2013-11-01

## Supporting Information

for

### Micro-flow synthesis and structural analysis of sterically crowded diimine ligands with five aryl rings

Shinichiro Fuse\*<sup>1</sup>, Nobutake Tanabe<sup>1</sup>, Akio Tannna<sup>2</sup>, Yohei Konishi<sup>2</sup> and Takashi  
Takahashi<sup>1</sup>

Address: <sup>1</sup>Department of Applied Chemistry, Tokyo Institute of Technology, 2-12-1,  
Ookayama, Meguro-ku, Tokyo, 152-8552, Japan and <sup>2</sup>Mitsubishi Chemical Group,  
Science and Technology Research Center, Inc., 1000 Kamoshida-cho, Aoba-ku,  
Yokohama 227-8502, Japan

E-mail: Shinichiro Fuse\* - [sfuse@apc.titech.ac.jp](mailto:sfuse@apc.titech.ac.jp)

\* Corresponding author

**<sup>1</sup>H and <sup>13</sup>C NMR spectra.**

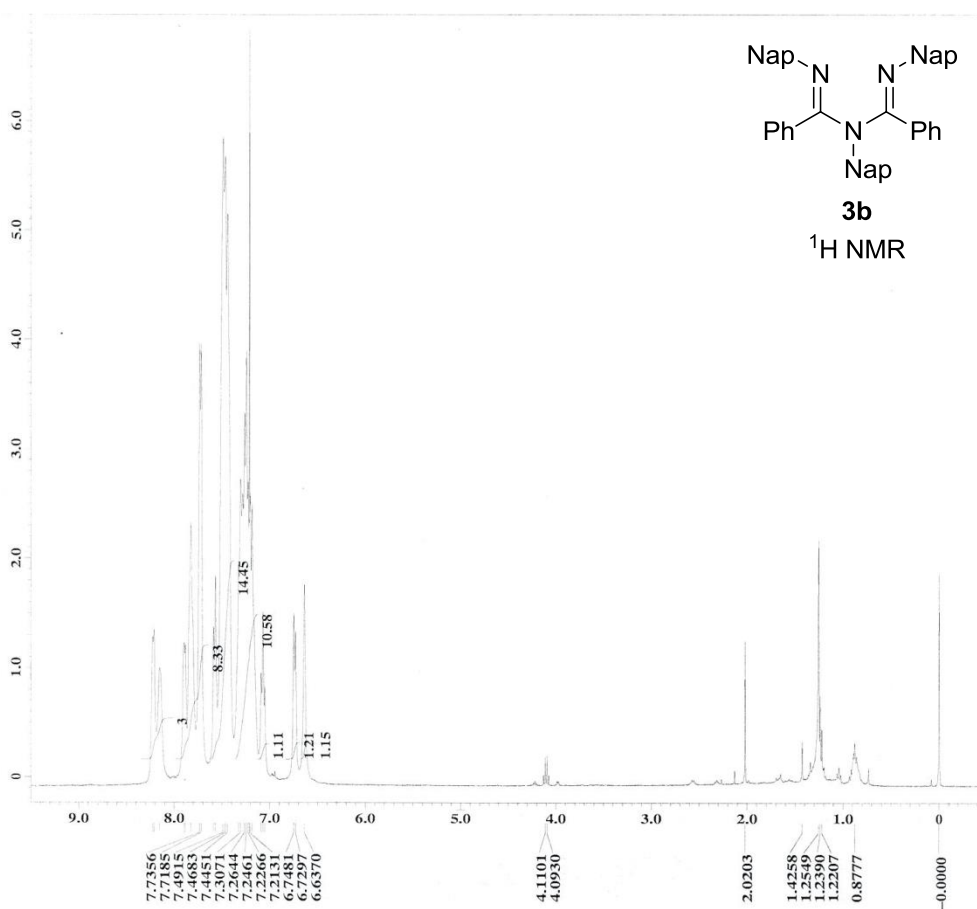

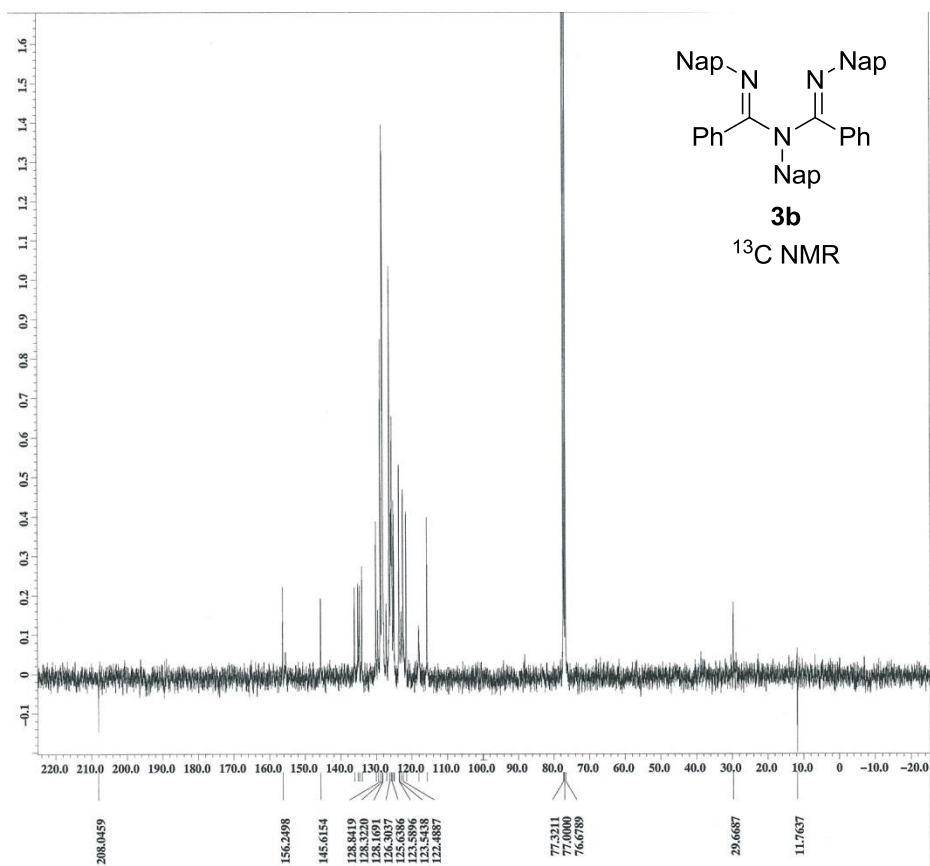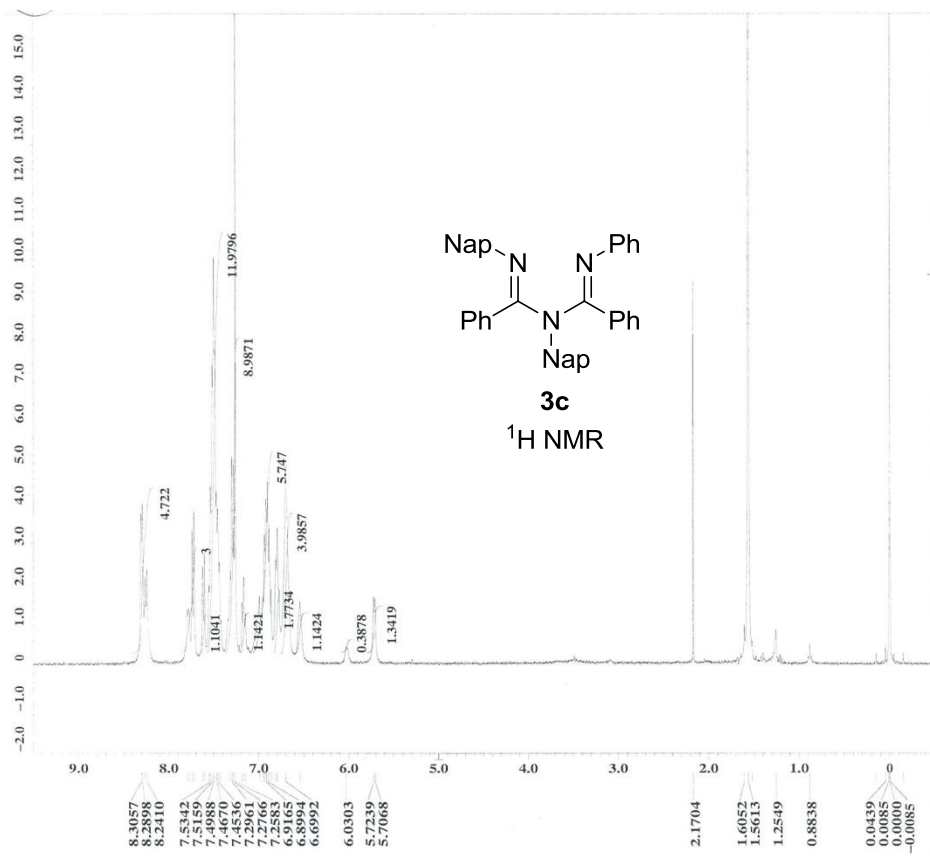

Supplement: Beilstein_J_Org_Chem-09-2336-s001.pdf [file Beilstein_J_Org_Chem-09-2336-s001.pdf]
